# Supplementary material for: Effects of bone morphogenetic protein 4 on TGF-β1-induced cell proliferation, apoptosis, activation and differentiation in mouse lung fibroblasts via ERK/p38 MAPK signaling pathway
Source: PeerJ journal article supplement (doi:10.7717/peerj.13775), 2022-07-27

**Western blot presented in this manuscript are listed as follows:**

**Figure 1B:**

**BMP4:**

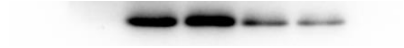

**$\beta$ -actin:**

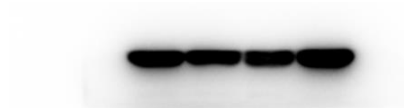

**Figure 2A:**

**BMP4:**

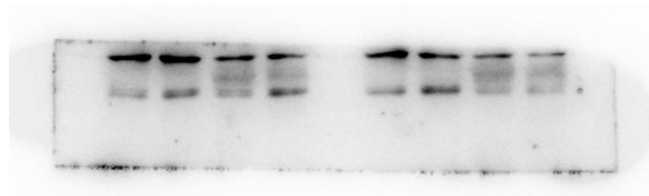

**$\beta$ -actin:**

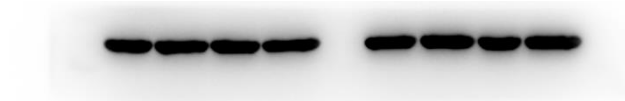

**Figure 2C:**

**Suvivin:**

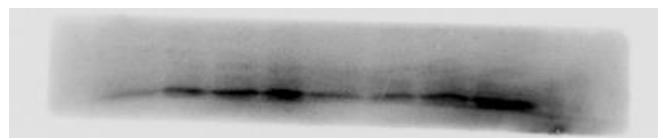

**PCNA:**

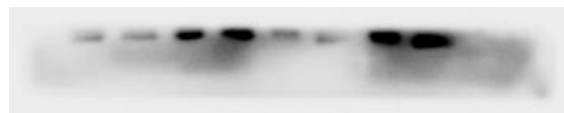

**$\beta$ -actin:**

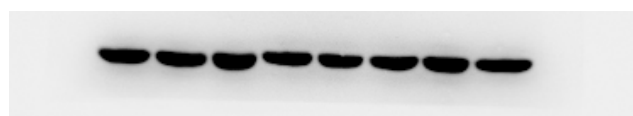

Figure 2F:

PCNA:

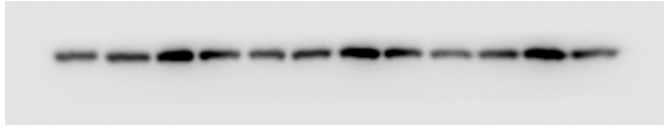

Suvivin:

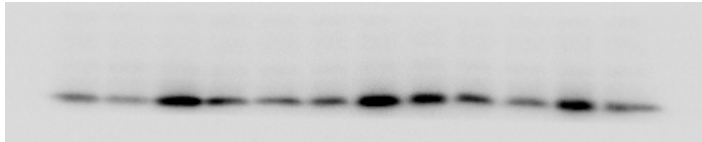

$\beta$ -actin:

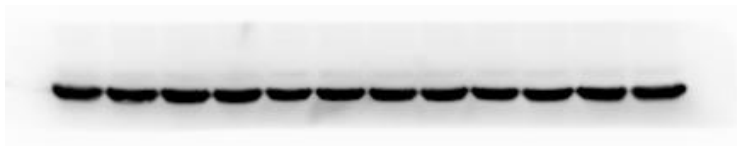

Figure 3C:

Bcl-2:

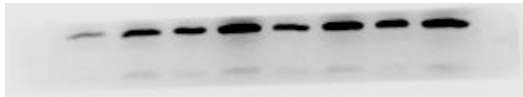

$\beta$ -actin:

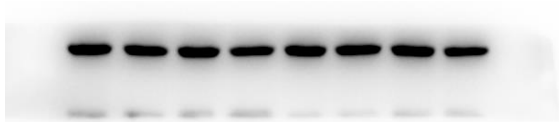

Figure 3D:

Bcl-2:

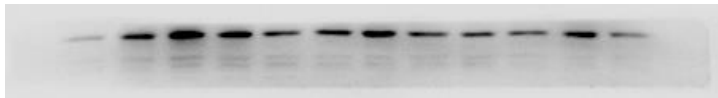

$\beta$ -actin:

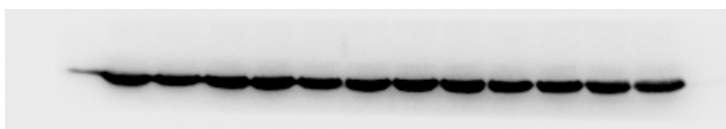

Figure 4A:

FAP:

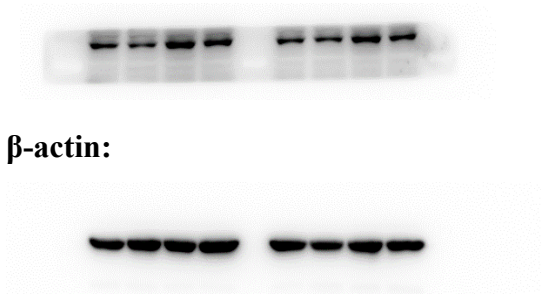

**$\beta$ -actin:**

**Figure 4B:**

**$\alpha$ -SMA:**

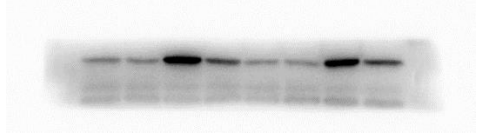

**$\beta$ -actin:**

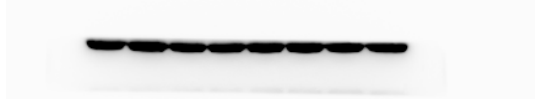

**Figure 5A:**

**p-ERK:**

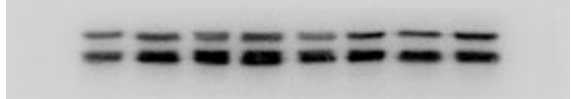

**ERK:**

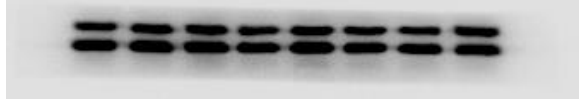

**p-p38:**

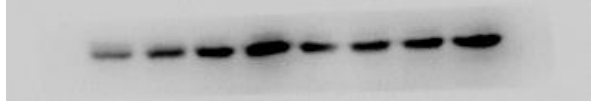

**P38:**

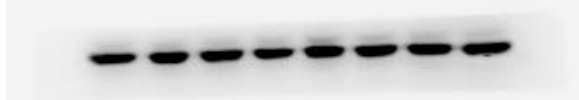

**$\beta$ -actin:**

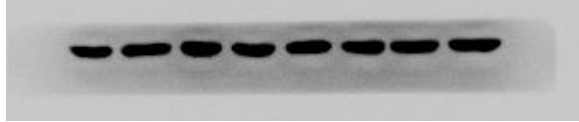

Figure 5D:

p-ERK:

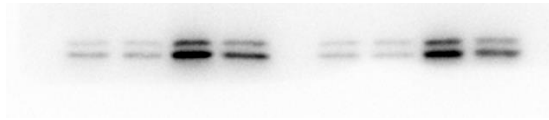

ERK:

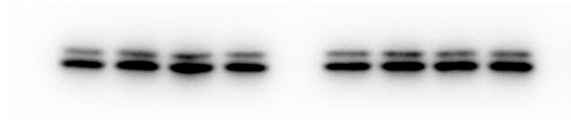

p-p38:

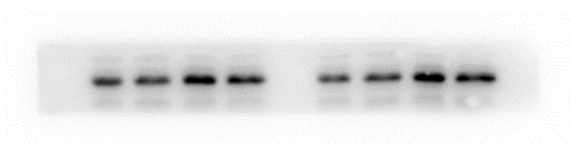

P38:

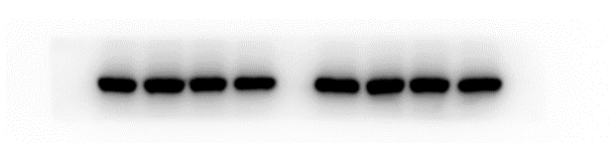

$\beta$ -actin:

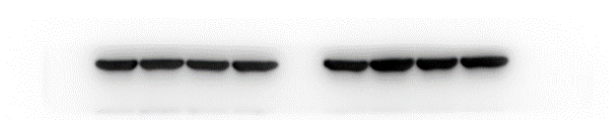

Supplement: all_the_uncropped_original_Western_blot.pdf [file all_the_uncropped_original_Western_blot.pdf]
